# Supplementary material for: Multiplex serology for impact evaluation of bed net distribution on burden of lymphatic filariasis and four species of human malaria in northern Mozambique
Source: PubMed Central journal article supplement (PMC5854460; doi:10.1371/journal.pntd.0006278), 2018-02-14
Supplement: pntd.0006278.s001.pdf [file pntd.0006278.s001.pdf]

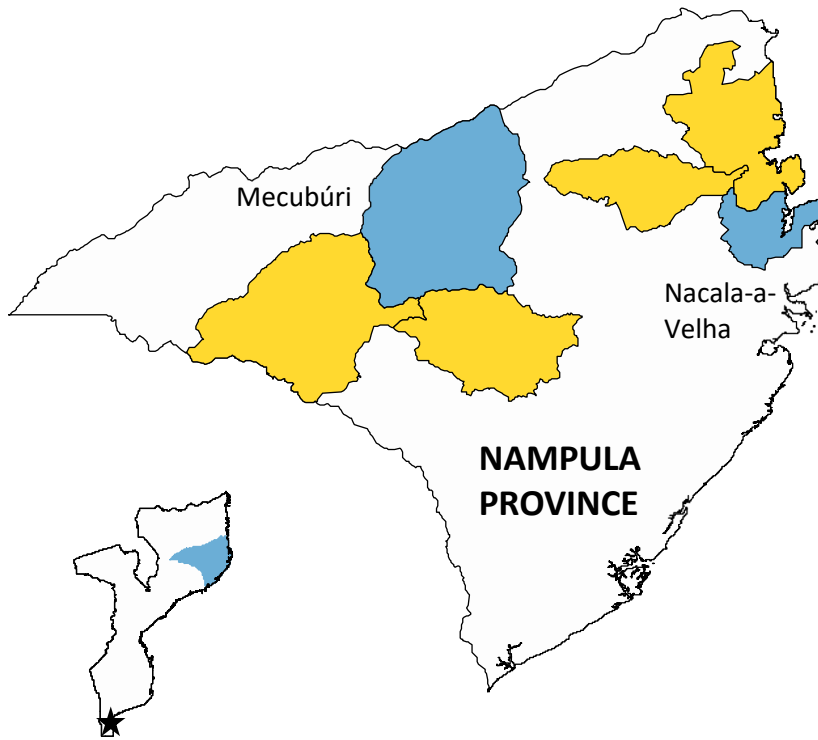

**S1 Figure.** Location of the six districts participating in the bed net distribution campaign, with the two districts chosen for the household survey highlighted in blue.
