# Supplementary material for: Multiplex serology for impact evaluation of bed net distribution on burden of lymphatic filariasis and four species of human malaria in northern Mozambique
Source: PubMed Central journal article supplement (PMC5854460; doi:10.1371/journal.pntd.0006278), 2018-02-14
Supplement: pntd.0006278.s003.pdf [file pntd.0006278.s003.pdf]

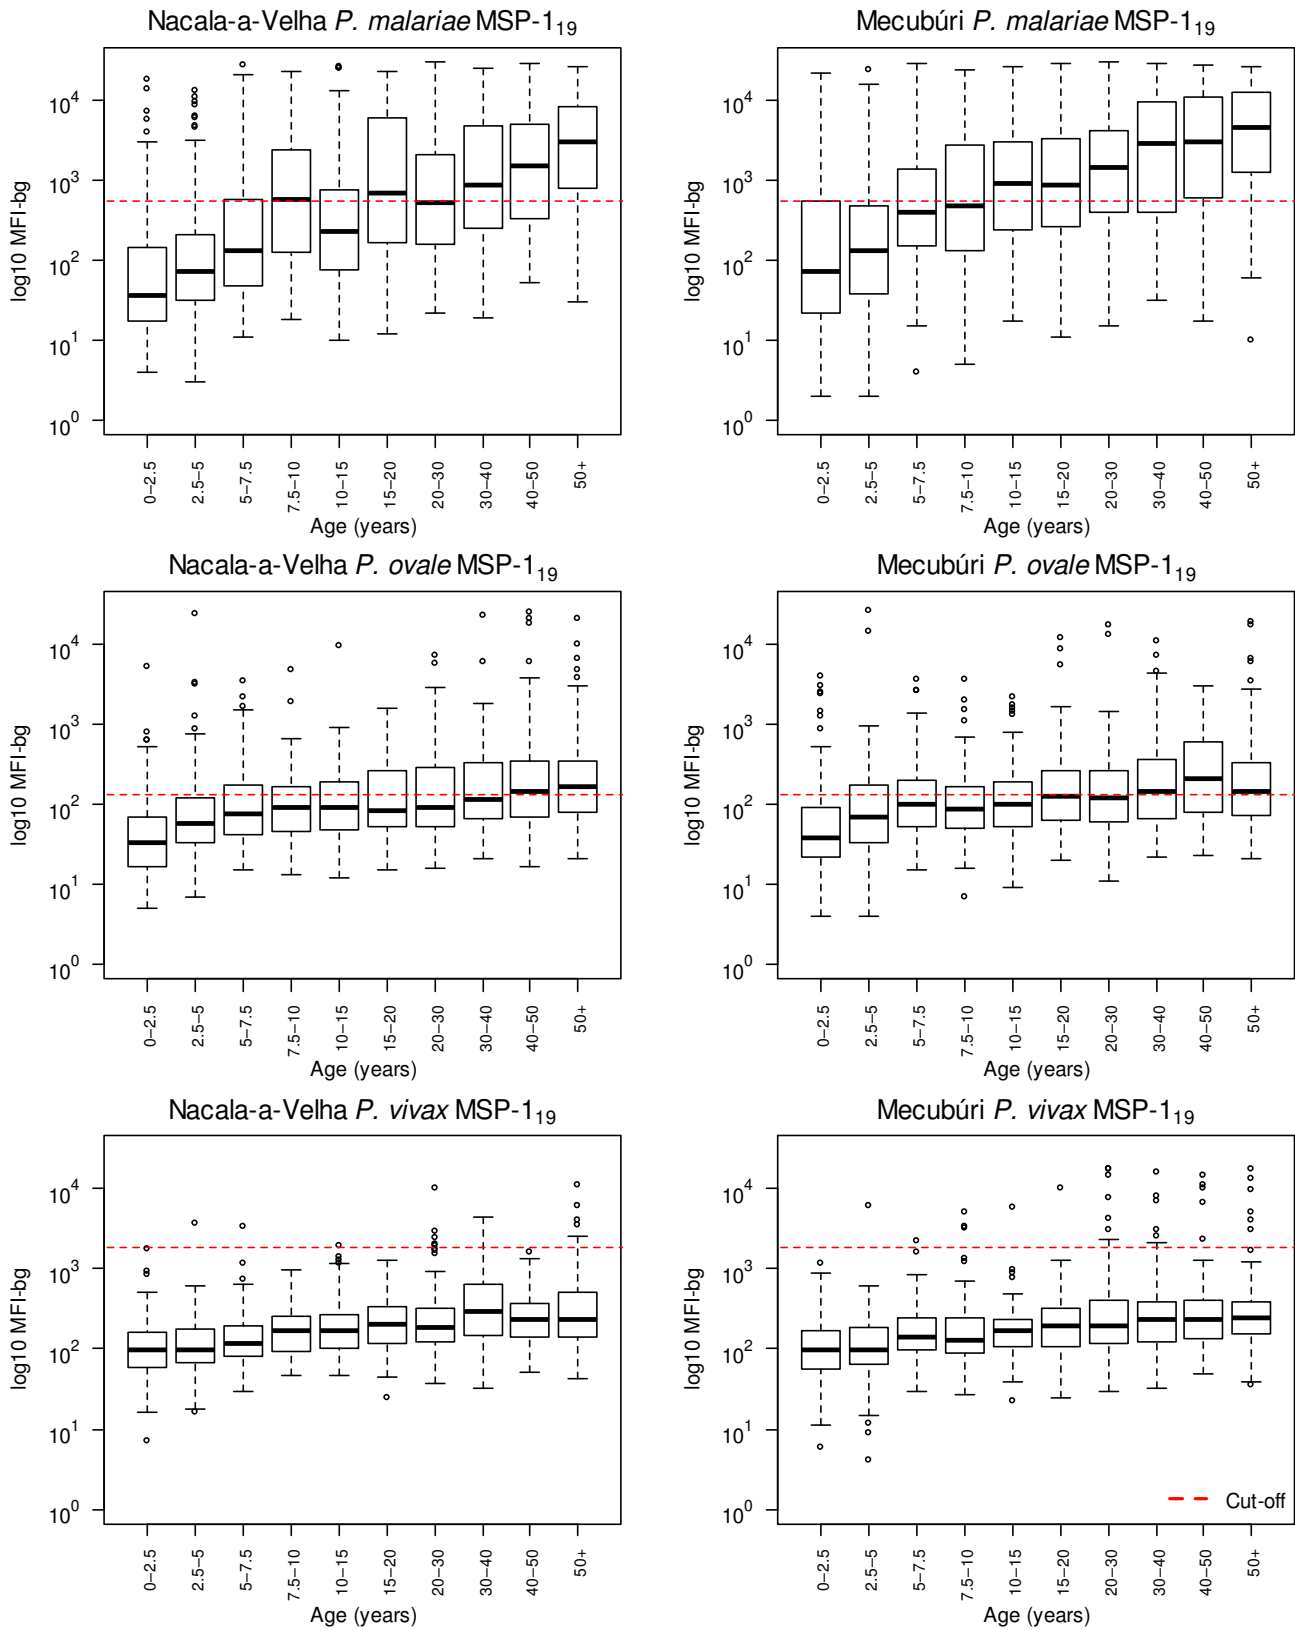

**S3 Figure.** Absolute antibody response to *P. ovale*, *P. malariae*, and *P. vivax* MSP-1<sub>19</sub> antigens in community members sampled during household surveys in Nacala-a-Velha and Mecubúri Districts, Northern Mozambique, combining data from both surveys 2013–2014. Red line indicates cut-off used to determine seropositivity. MFI: Median Fluorescent Intensity.
