# Supplementary material for: Multiplex serology for impact evaluation of bed net distribution on burden of lymphatic filariasis and four species of human malaria in northern Mozambique
Source: PubMed Central journal article supplement (PMC5854460; doi:10.1371/journal.pntd.0006278), 2018-02-14
Supplement: pntd.0006278.s005.pdf [file pntd.0006278.s005.pdf]

**S1 Table.** Cut-offs for antigens assayed for using IgG bead-based multiplex assay on samples collected during household surveys in Nacala-a-Velha and Mecubúri Districts, Northern Mozambique, 2013–2014

| Antigen                                  | Cut-off (MFI-bg) |
|------------------------------------------|------------------|
| <i>P. falciparum</i> MSP-1 <sub>19</sub> | 615              |
| <i>P. falciparum</i> CSP                 | 1767             |
| <i>P. falciparum</i> LSA-1               | 236              |
| <i>P. malariae</i> MSP-1 <sub>19</sub>   | 538              |
| <i>P. ovale</i> MSP-1 <sub>19</sub>      | 131              |
| <i>P. vivax</i> MSP-1 <sub>19</sub>      | 1869             |
| <i>W. bancrofti</i> Wb123                | 188              |
| <i>B. malayi</i> Bm14                    | 271              |
| <i>B. malayi</i> Bm33                    | 619              |
| <i>S. stercoralis</i> NIE (Control)      | 967              |

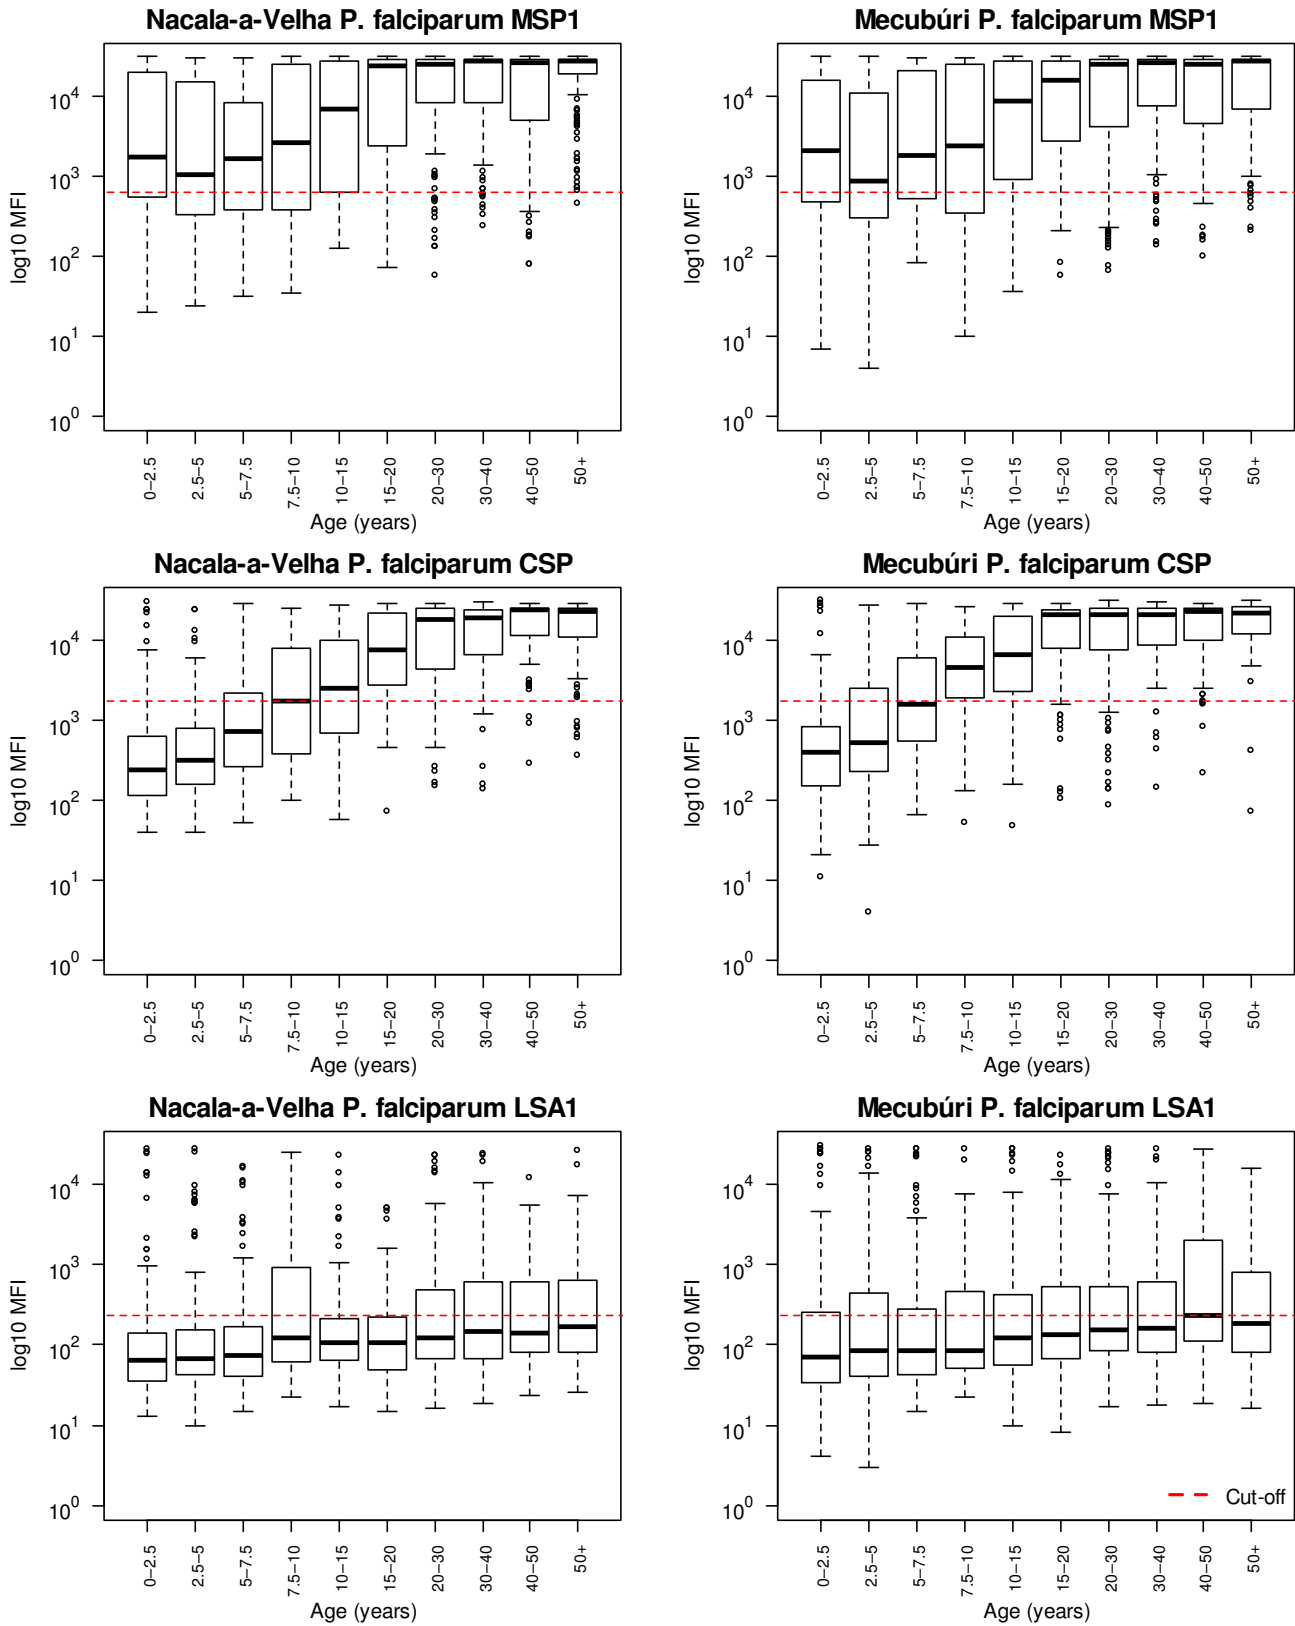

**Supplemental Figure S2.** Absolute antibody response to three *P. falciparum* antigens in community members sampled during household surveys in Nacala-a-Velha and Mecubúri Districts, Northern Mozambique, combining data from both surveys 2013–2014. Red line indicates cut-off used to determine seropositivity. MFI: Mean Fluorescence Intensity.

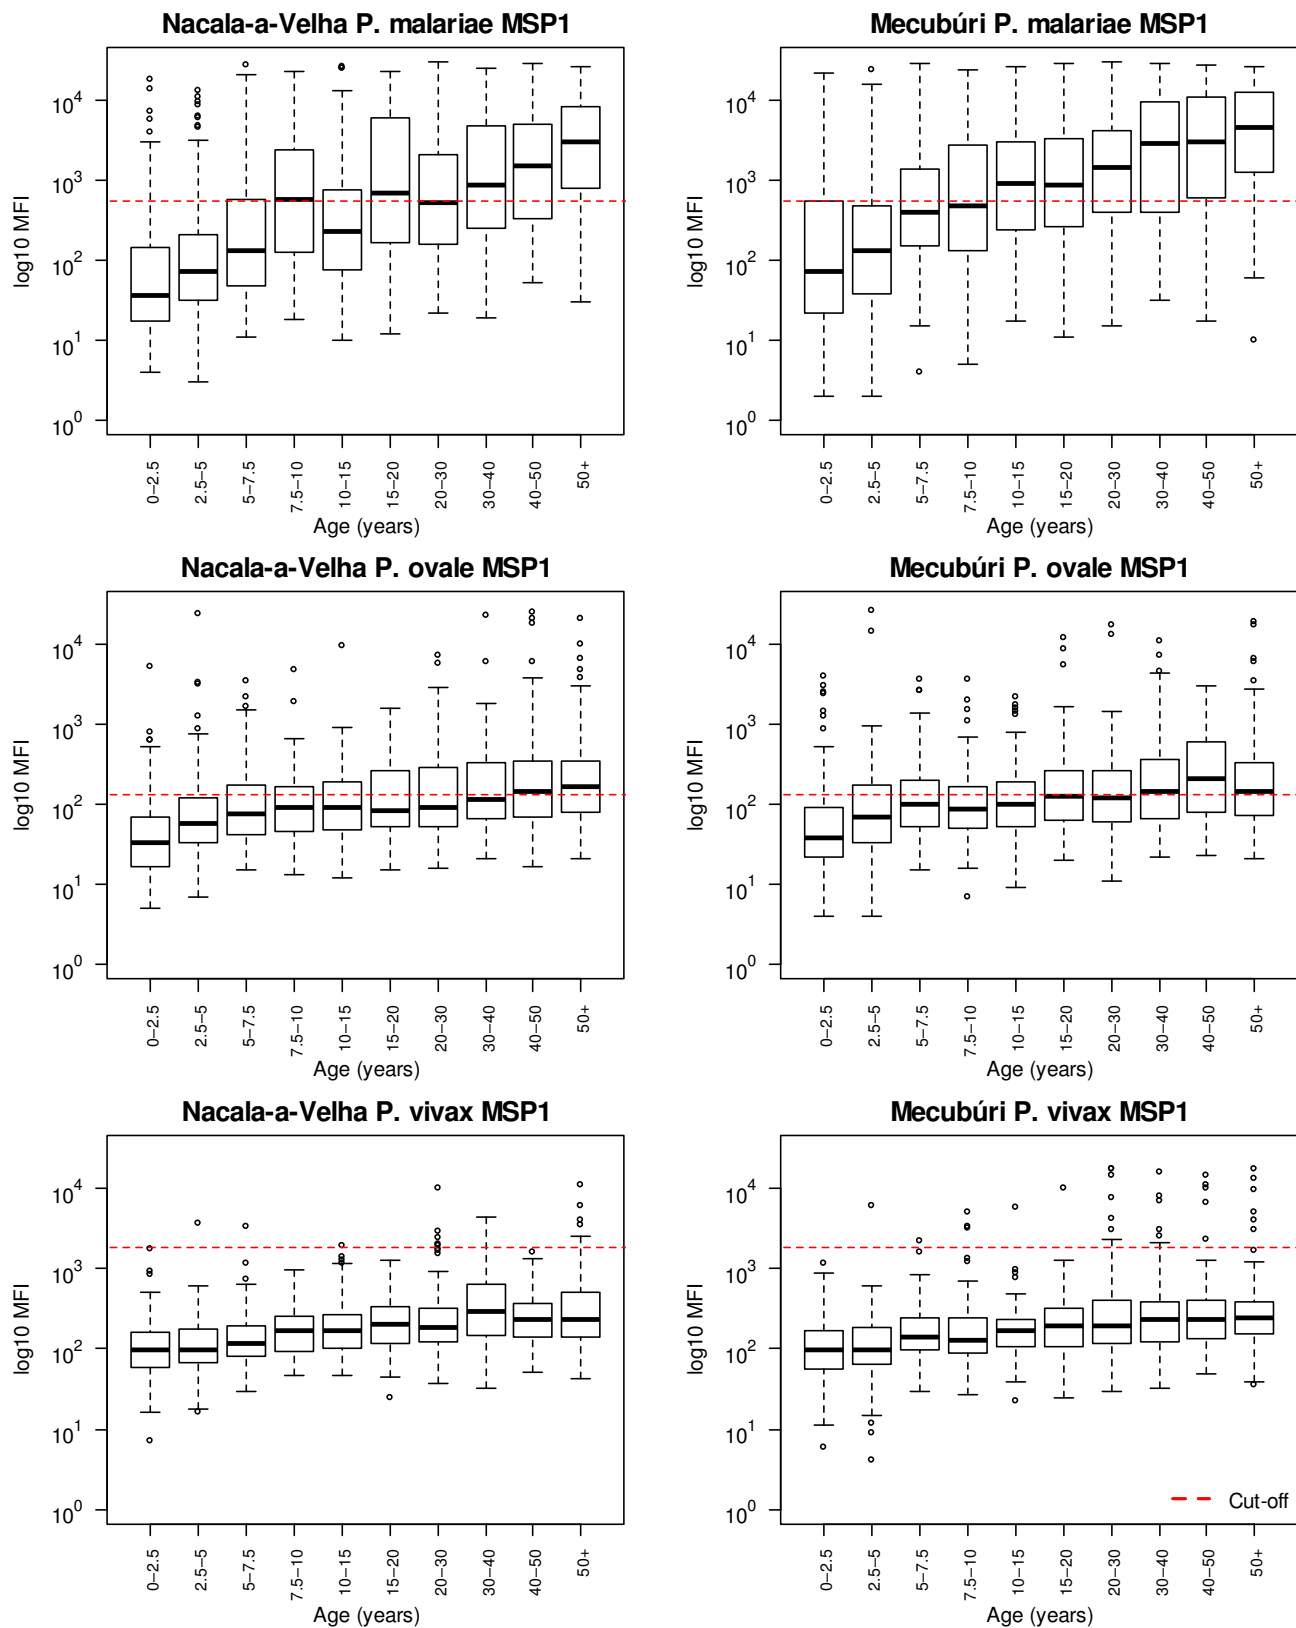

**Supplemental Figure S3.** Absolute antibody response to *P. ovale*, *P. malariae*, and *P. vivax* MSP1<sub>19</sub> antigens in community members sampled during household surveys in Nacala-a-Velha and Mecubúri Districts, Northern Mozambique, combining data from both surveys 2013–2014. Red line indicates cut-off used to determine seropositivity. MFI: Mean Fluorescence Intensity.

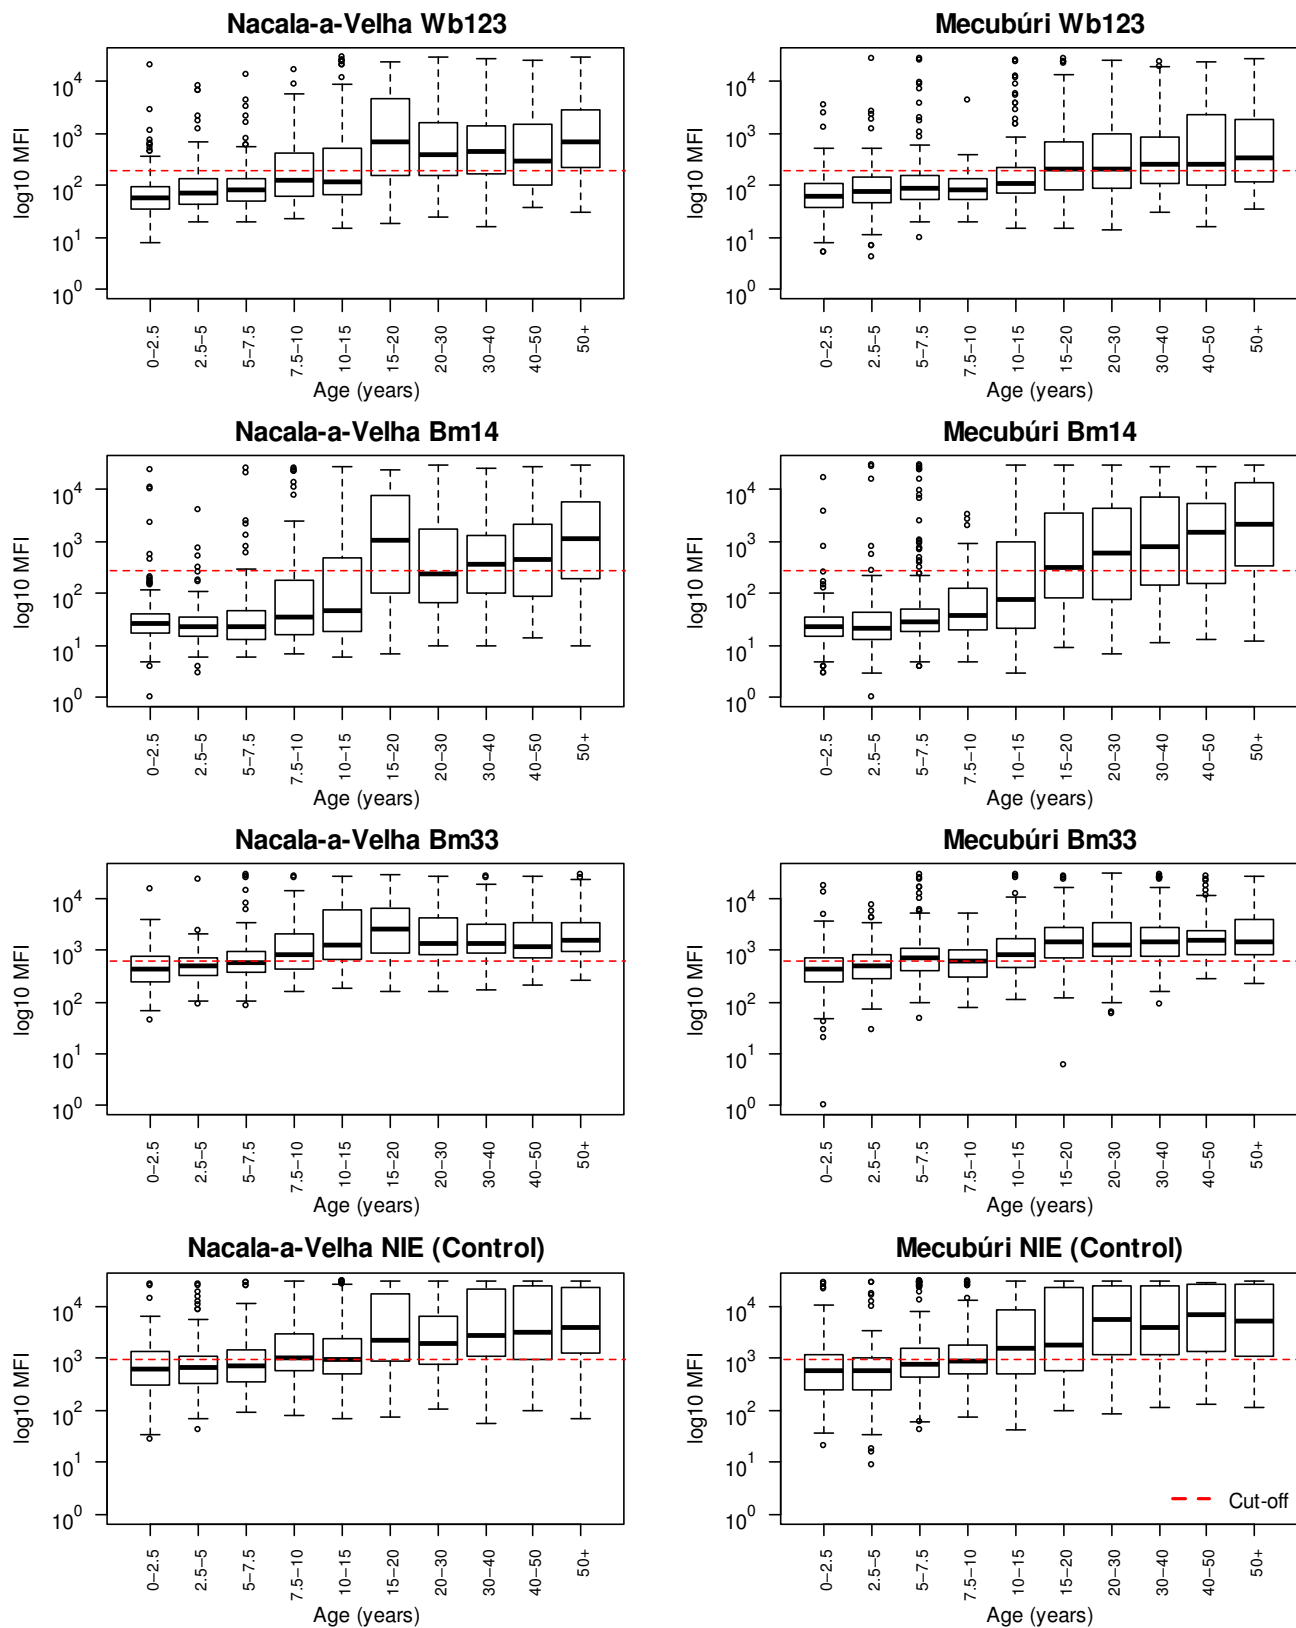

**Supplemental Figure S4.** Absolute antibody response to three lymphatic filariasis antigens and the strongyloides NIE (control) antigen in community members sampled during household surveys in Nacala-a-Velha and Mecubúri Districts, Northern Mozambique, combining data from both surveys 2013–2014. Red line indicates cut-off used to determine seropositivity. MFI: Mean Fluorescence Intensity.
